# Supplementary material for: Protective Effects of Protocatechuic Acid on Seizure-Induced Neuronal Death
Source: PubMed Central journal article supplement (PMC5796136; doi:10.3390/ijms19010187), 2018-01-08
Supplement: ijms-19-00187-s001.pdf [file ijms-19-00187-s001.pdf]

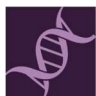

# Protective Effects of Protocatechuic Acid on Seizure-Induced Neuronal Death

Song Hee Lee, Bo Young Choi, A Ra Kho, Jeong Hyun Jeong, Dae Ki Hong,  
Sang Hwon Lee, Sang Yup Lee, Min Woo Lee, Hong Ki Song, Hui Chul Choi  
and Sang Won Suh

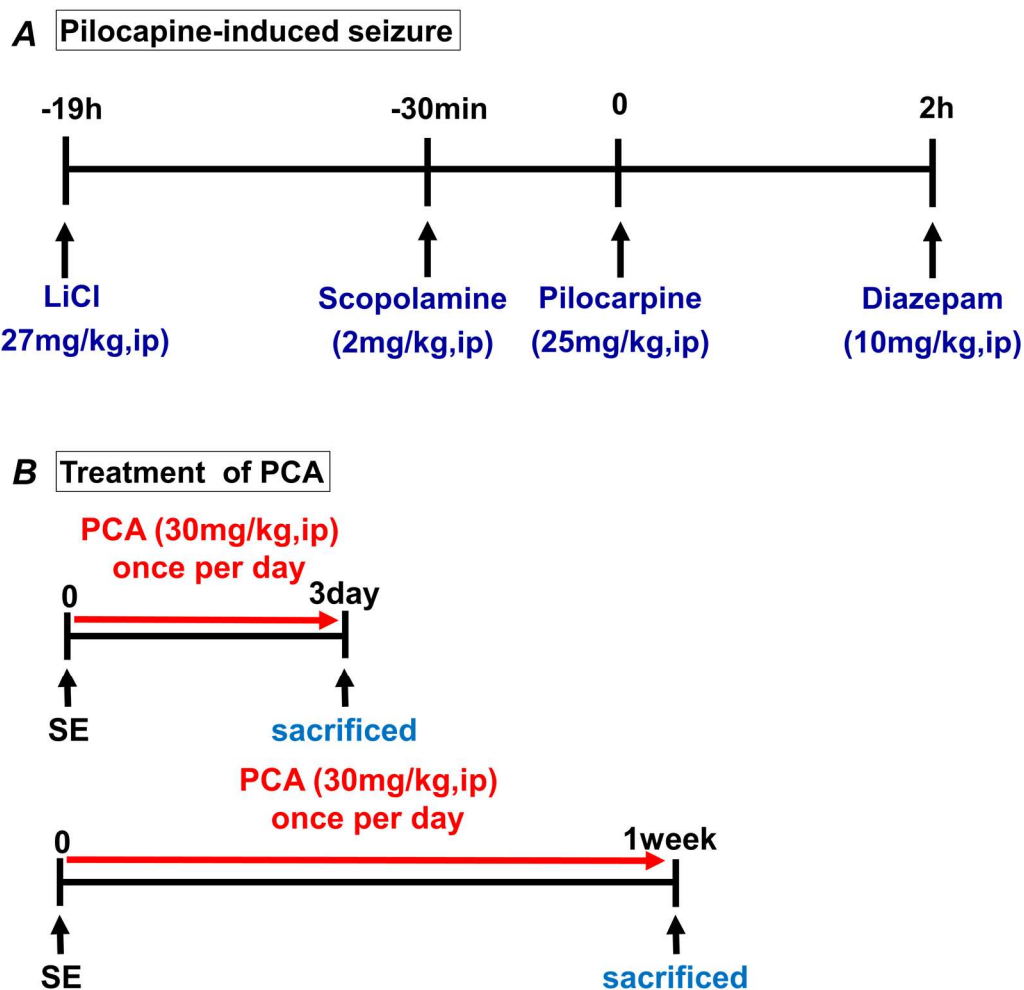

**Figure S1.** Supplementary figure shows the experimental procedure. (A) Experimental procedure in the Pilocarpine-induced seizure rats. (B) Experimental procedure for the duration of PCA administration.
